# Supplementary material for: Highly sensitive electrochemical label-free aptasensor based on dual electrocatalytic amplification of Pt–AuNPs and HRP
Source: Royal Society of Chemistry journal article supplement (doi:10.1039/c0an00755b), 2011-01-01
Supplement: c0an00755b.pdf [file c0an00755b.pdf]

**Table S1.** Current variation of the two aptasensors at 4 °C and 25 °C for ten days.

| Sample     | I <sub>0</sub> (Initial current, μA) | I <sub>1</sub> (μA) | I <sub>2</sub> (μA) | I <sub>3</sub> (μA) | I <sub>4</sub> (μA) | I <sub>5</sub> (μA) | (I <sub>5</sub> -I <sub>0</sub> )/I <sub>0</sub> (%) |
|------------|--------------------------------------|---------------------|---------------------|---------------------|---------------------|---------------------|------------------------------------------------------|
| E1 (4 °C)  | 116                                  | 115                 | 115                 | 114                 | 113                 | 112                 | 3.45                                                 |
| E2 (4 °C)  | 104                                  | 103                 | 103                 | 102                 | 101                 | 100                 | 3.85                                                 |
| E1 (25 °C) | 113                                  | 106                 | 101                 | 99.3                | 98.1                | 97.2                | 14.0                                                 |
| E2 (25 °C) | 101                                  | 99.8                | 99.1                | 98.2                | 97.3                | 95.6                | 5.34                                                 |

**Table S2.** Determination of thrombin added in human serum with the proposed aptasensor.

| Serum samples | Concentration of thrombin added (nM) | Concentration obtained with aptasensor (nM) | Relative standard deviation (%) <sup>a</sup> | Recovery (%) |
|---------------|--------------------------------------|---------------------------------------------|----------------------------------------------|--------------|
| 1             | 0.150                                | 0.160                                       | 4.62                                         | 107          |
| 2             | 1.00                                 | 1.02                                        | 3.26                                         | 102          |
| 3             | 5.00                                 | 4.63                                        | 2.73                                         | 92.6         |
| 4             | 15.0                                 | 15.8                                        | 3.29                                         | 105          |
| 5             | 30.0                                 | 28.1                                        | 2.08                                         | 93.7         |

<sup>a</sup>Standard deviation (S) was defined as  $S^2 = \sum (C_i - C)^2 / (n-1)$ , where C is the average concentration of thrombin obtained with aptasensor by means of three measurements ( $n=3, i=1, 2, 3$ ).

Relative standard deviation (RSD) was defined as  $RSD = S/C \times 100\%$
